# Supplementary material for: Relationship between Dietary n-6 Fatty Acid Intake and Hypertension: Effect of Glycated Hemoglobin Levels
Source: PubMed Central journal article supplement (PMC6316654; doi:10.3390/nu10121825), 2018-11-24
Supplement: nutrients-10-01825-s001.pdf [file nutrients-10-01825-s001.pdf]

**Supplementary Table S1.** Interaction between BP and gender groups by n-6 fatty acid intake.

| <i>n</i> -6 fatty acid              | HbA1c level | Hypertension | Normal BP    | P value for interaction |
|-------------------------------------|-------------|--------------|--------------|-------------------------|
|                                     |             | Average (SD) | Average (SD) |                         |
| <i>n</i> -6 fatty acid (g/1000kcal) | Male        | 4.77 (1.31)  | 5.18 (1.41)  | 0.312                   |
|                                     | Female      | 5.56 (1.46)  | 5.75 (1.25)  |                         |
| LA (g/1000kcal)                     | Male        | 4.62 (1.28)  | 5.02 (1.39)  | 0.309                   |
|                                     | Female      | 5.40 (1.43)  | 5.58 (1.23)  |                         |
| GLA (mg/1000kcal)                   | Male        | 3.78 (2.44)  | 3.91 (2.45)  | 0.700                   |
|                                     | Female      | 4.16 (2.36)  | 4.46 (3.24)  |                         |
| EA (mg/1000kcal)                    | Male        | 22.4 (8.32)  | 24.4 (8.23)  | 0.452                   |
|                                     | Female      | 25.4 (8.69)  | 26.3 (8.38)  |                         |
| DGLA (mg/1000kcal)                  | Male        | 14.5 (5.18)  | 15.3 (4.55)  | 0.966                   |
|                                     | Female      | 16.6 (5.05)  | 17.4 (4.91)  |                         |
| AA (mg/1000kcal)                    | Male        | 86.3 (32.2)  | 91.0 (30.2)  | 0.649                   |
|                                     | Female      | 95.7 (30.5)  | 98.1 (28.4)  |                         |
| DPA (mg/1000kcal)                   | Male        | 5.12 (3.16)  | 4.97 (2.98)  | 0.652                   |
|                                     | Female      | 5.63 (3.24)  | 5.24 (3.53)  |                         |

P values from two-way analysis of variance means interaction between gender groups and BP groups. Hypertensive subjects were defined as participants with a greater SBP than 140 mmHg, a DBP than 90 mmHg, or the use of antihypertensive medication. 299 participants were male; 103 male participants had a normal BP, and 196 had hypertension. There were 334 female participants; 180 had a normal BP, and 154 had hypertension. Abbreviations: BP, blood pressure; HbA1c, hemoglobin A1c; LA, linoleic acid; GLA, Gamma-linolenic acid; EA, eicosadienoic acid; DGLA, dihomogamma-linolenic acid; AA, arachidonic acid; and DPA, docosapentaenoic acid.
